# Supplementary material for: Resistance in the Genus Spodoptera: Key Insect Detoxification Genes
Source: MDPI journal article supplement (doi:10.3390/insects12060544), 2021-06-11
Supplement: s1 [file s1]

**Table S1:** CCE transcripts of *S. littoralis*

| C<br>L<br>A<br>S<br>S<br>I<br>F<br>I<br>C<br>A<br>T<br>I<br>O<br>N | Sequence name<br>(RNAseq) | sequence (aa)                                                                                                                                                                                                                                                                                                                                                                                                                                                                                                                                                                                                                           | a<br>a<br>l<br>e<br>n<br>g<br>t<br>h |
|--------------------------------------------------------------------|---------------------------|-----------------------------------------------------------------------------------------------------------------------------------------------------------------------------------------------------------------------------------------------------------------------------------------------------------------------------------------------------------------------------------------------------------------------------------------------------------------------------------------------------------------------------------------------------------------------------------------------------------------------------------------|--------------------------------------|
| C<br>l<br>a<br>s<br>s<br>e<br>0<br>1<br>6                          | SlitCXB67                 | MRLITTVGVLIILCVIHNISCDDDVTLVEVEQGQLRGQVLDVAVVGDFQYLSYKGI PYAKPPVVKLRFKDPEYLD SWE<br>GVLNATEHGSVCPQFNPI TAVYTSGSEDCFLNVYTRNLTPDAPRPVVVFIHGGAIFGSGNTDLYRPDYLLANDV<br>IVVTINRYRLGVLGFLSLGNEDVPGNAALKDQVTALKWVQNNIEKFGGNPNSVTI VGD TAGGASVTLHMLSPMSKGL<br>FHKAVAMSGSATCDFGLTYKHVEKAKIFGSALKCENVEDSAALLDCLQAADYNAFYSITPTVLASEEITDVLFKME<br>HFTFPVIEKKTGNNFLTEDYYSALTKGHVNKD VDFIIGYSSQEA VLLIDLFNASYVDLYSR YKELFTPSEILIKSTP<br>DTNLNVAKS VKEFYFGEKPVKTENLNL FVKYSSSSASIGYHAQRYANKWANFGKKT YFYIFDGF TDWNFFGQQGVKY<br>GIEKASHFDITYYLFYPESLNWSIDTDSVEYQVTKQLTSLTNFAKSSDPV DGV TWPQYSESSKAYVTFGNDGPV<br>VGYPDEDDYNFWAGVYKSAGIPF                  | 5<br>5<br>6                          |
|                                                                    | SlitCXB54                 | MMSTVLRIALLCVVLSEALAMVQVRVSDGLLEGEVHVNEYGGTYFSFLGIPYAQPPLGDLRFKAPQPPKPWDGVR<br>AKEFGPKCFQYDLFVDKGHVTGSEDCLYLNVYTPDVTVPVKPLPVMVWIHGGGLVSGAGDDQEYGPFLVRQDVILV<br>TLNRYRLEVLGFLCLDTE DAPGNAGMKDQVAALRWVKENIANFGGDPDNTIFGESAGGVSVTYHMLSPMSKGLFQR<br>AIAQSGVSVSYWAQAYKPRERGFALARKLGFYSDDVKDVYEFLLKQPIENLIKTKVPITYSEKERTNVEVYFSVVE<br>EKQFGDNERFFYGDMIDAVSNGIHEGVDMITGYTAD EGI LSLAIFGDISASLEQARNFPQLFISY PMSLTLSTNDQLELGRKIREYFKNSISVPD<br>LELGNRLKEYYFKEQIRVPDHWESLKD FYSMDIFVFP TMRWIKLSARSKKNKIYLYKFTCYTELNI VSELMGVGH<br>VGNGKPVVAHSDDLMYLFSARNQTKLDMNSEEKQIEVVT KLW TNFAKYG NPTPDDSPGVAWAPYSLENQDYLDIGN<br>ELKAGQAPDDEEIKFWENLLTEYGQKLY | 5<br>6<br>0                          |
|                                                                    | SlitCXB55                 | MVQVQVNEGWLLEGEVVQNEYGGSYYSFKGI PYAQPLGELRFKAPQPPKPWDVRS AKQFGSKCYQYDAFFEKGKV<br>CGSEDCLYLNVYTPSIKPDKPLPVMFVIHGGSFISGAGDDDVYGPFLVRQDVILVTFNRYRLEVLGFLCLDTE DVP<br>GNAGMKDQVAALRWVNKNIANFGGDPNNITIFGESAGGASVTYHLISPM SKGLFRRAIAQSGTNVGYWAQAYKPRE<br>RGFALARKLGFYSDDPKQVYEFLLKEQPLEALIKAAVPITYSEKARTYTEFYFSVAAEKQFGNSKQFFCGDVLDSVS<br>NGIHEGVDMITGYTAD EGI LSLAIFGDISASLEQARNFPQLFISY PMSLTLSTNDQLELGRKIREYFKNSISVPD<br>DWEKLEKFYAADLFVFPANRWIKLCAQSKKNKVYFYKFTCVSELNMI SQMIGVGD LKDKPVVAHADDDL LYLFTPN<br>TSPIIDRNSKTFQHVEKVTKLW TNFAKFGNPTPDDSLGVTWTPYSVANKDYLDIGNELKPGHAPDDEEVQFWENVL<br>TEFNQKLY                                      | 5<br>4<br>0                          |
|                                                                    | SlitCXB56                 | MVQVQVNEGWLLEGEVVQNEYGGSYYSFKGI PYAQPLGELRFKAPQPPKPWDVRS AKQFGSKCYQYDAFFEKGKV<br>CGSEDCLYLNVYTPSIKPDKPLPVMFVIHGGGFISGAGDDDVYGPFLVRQDVILVTFNRYRLEVLGFLCLDTE DVP<br>GNAGMKDQVAALRWVNKNIANFGGDPNNVTIFGESVGGASVTYHLISPM SKGLFRRAIAQSGTNVGYWAQAYKPRE<br>RGFALARKLGFYSDDPKQVYEFLLKEQPLEALIKAAVPITYSEKARTYTELYFSVAAEKQFGNNERFFCGDVLDSVS<br>NGIHEGVDMITGYTAD EGI LSLAVFGDVSTSLAQARNFPQFFISY PMSLTLSTNDQLELGRKIREYFKNSISVPD<br>DWEKLEKFYAADLFVFPANRWIKLCAQSKKNKVYFYKFTCVSELNMI SQMIGVGD LKDKPVVAHADDDL LYLFTSPN<br>SSPIIDRNSKTFQHVEKVTKLW TNFAKFGNPTPDDSLGVTWTPYSVANKDYLDIGNELKPGHAPDDEEVQFWENVL<br>TEFNQKLY                                     | 5<br>4<br>0                          |
|                                                                    | SlitCXB57                 | MVQVQVNEGWLLEGEVVQNEYGGSYYSFKGI PYAQPLGELRFKAPQPPKPWDVRS AKQFGSKCYQYDAFFEKGKV<br>CGSEDCLYLNVYTPSSKPDKPLPVMFVIHGGGFISGAGDDDVYGPFLVRQDVILVTFNRYRLEVLGFLCLDTE DVP<br>GNAGMKDQVAALRWVNKNIANFGGDPNNITIFVGESAGGASVTYHLISPM SKGLFRRAIAQSGSNVGYWAQAYKPR<br>ERGFALARKLGFHSDDPKQVYEFLLKEQPV EALIKAAVPITYSEKVRDNEIYFNVTAEKQFGNNEQFFYGDVLDSVA<br>NGTHEGVDMITGYTAD EGI MSLAVFGDISANLEQARNFPQFFITYPMSLTLSTNDQLELGRKIREYFKNSISIPD<br>DWEKLEKFYAACQFLFPANRWIKLCAQSKKNKVYFYKFTCVSELNMI SQMIGVGD LKDKPVVAHADDDL LYLFTSPN<br>SSPIIDRNSKTFQHVEKVTKLW TNFAKFGNPTPDDSLGVTWTPYSVANKDYLDIGNELKPGHAPDDEEVQFWENVL<br>TEFNQKLY                                     | 5<br>4<br>0                          |
|                                                                    | SlitCXB63                 | MVQVRVNEGWLLEGERVDNDYGGSFYSFKGI PYAQPPVGD LRFKAPLPKPSWDGVRSAKEFGPRSFQNDILMKTGLV<br>GEDCLYLNVYTP EIKPDKPLPVMFVIHGGGFYCGSGNDDLYGPEFLIRHGVLVTINRYRVDVLGFLCLDTE DIPG<br>NAGMKDQVQALRWVNKNIASFGGDPKNITIFGESAGGSSVSYHLISPM SKGLFKRAIAQSGVSTCAWAQAI EPRER<br>ALALARSLGCHSSEDDKELYDF FKNQPKESLVGVQCPVATFEAFKGLDIYFNVANEEKFGDNERFFYGDMLDVISN<br>SVHEGVEIMMGSTTEEG LISYADSEDI IKTLLAKIYPEYFVNKL VAFSLPLKQQLKIGKEVRKFYFNDQINVPDD<br>WDKLINFTSMQNFVYPERQWAKHSAQGKHKLYLYKF SCKTERNFIAKMRGMTEMLGNREVTCHADELTYLFNPKL<br>MPTKLDTASETFQ LMERLMKLW TNFAKYG NPTPDDSLGAKWAPYTLENQEYLDIGNELKTGTAPDAEETQFWDKLY<br>EKYGL                                       | 5<br>3<br>7                          |
|                                                                    | SlitCXB64                 | MVQVRVNEGWLLEGEQVDNHYGGSFYSFKGI PYAQPPVGD LRFKAPLPKPWDGVRTAKEFGPKSYQNDIFMNVGRV<br>GEEDCLYLNVYTPSIKPDKPLPVMFYIHGGGFYSGSGNDDLYGPELLVRHGVLVTINRYRVDVLGFLCLDTE DIPG<br>NAGMKDQVQALRWVNKNIANFGGDPKNITIFGESAGGASVSYHLISPM SKGLFKRAIAQSGASTSPWAQAVEPRER<br>ALALARSLGFYSEDDKELYEFFKHQPMESI VGVVPVSATFEAFKGGIDVNTVVNEKKFGGENERFFYGD MIDAVSN<br>GVHEGVEIMTGT TTEGLIAMGDLKDTTKALELARTYPEI FMNKYEAYNLPLKQQLKIGREIRKFYFNDQVINPDD<br>WDKLMNFLSMQMFVYSTMQVVKYCVQAKKHKLYLYKF SCKSERNVMSFLRGQTEMLGSRRTVCHADELTYLFNPKL<br>MPKMDTASATFKMVERILT LWTNFAKYG NPTPDDSLGVNWPYTLENQEYLDIGNELKAGTAPDAEETQFWDNLYE<br>KYEL                                           | 5<br>3<br>6                          |
|                                                                    | SlitCXB108                | MHTKISFFIIFTFLQWIFCEYVEVEVAQGRLRGERLETVTGEAAYYSFKGIPYAKPPVGT LRFKDLPLPPEWDGV<br>RDTAQHGSVCPQVELLNNI VIPGNE DCLFLNVYTPILTPTPLPVMVFIHGGGFKFGSGNVDVYGPDLVAKDVIV<br>VTMNYRLDVLGFLALGTKEVPGNAGMKDQVVALRWVNENIENFGGDSRNITLFGESAGATAVAYHLVSPISKGMFQ<br>RAILQSGATSLDCFI PYKPRERAFVLGNSLNI TTKNSTELL LSLQELPAVELLNRTAYLFASESITHIQKF TPTPT<br>PVIEEDFGQDMRFVSEDPFDSL DNGNVNDVDMF SYNKHETLIMLPFYVNDNFRIYQRYNRYPELLVPSKILIKAN<br>TDDIYYLWNKINDFYFGDKSISVENMPEFIKYSSFASVVYDVHRRFIRRWPSVGNVYLFKFESYSSRSYYGLQGASY<br>GIGPAHFDDL FYVFDPKIMQFSLP INSTEYKVMVQM TTI FTNFAKYG NPTPDKSLGVFWPQYNRSRQAYAIADN<br>ITIGYKPKADKIKFWKEVLEYAHIKF                     | 5<br>5<br>8                          |

|                                      |            |                                                                                                                                                                                                                                                                                                                                                                                                                                                                                                                                                                                                                               |             |
|--------------------------------------|------------|-------------------------------------------------------------------------------------------------------------------------------------------------------------------------------------------------------------------------------------------------------------------------------------------------------------------------------------------------------------------------------------------------------------------------------------------------------------------------------------------------------------------------------------------------------------------------------------------------------------------------------|-------------|
|                                      | SlitCXE86  | MGDADCLPSGDPSARLPILHWISCEYVEVEVAQQQLRGELLDVTVTGEAKYYSFKGIPYAKPPVGDRLRFKDPQPPEP<br>WDGVRNATQHGSVCPQIDLLNSIVVPGSEDCFLFNVTYTNLTENPLPVMVF IHGGGFKFGSGNVVDVYGPDLVPAK<br>DVIIVTMNYRLDVLGFLALGTKEVPGNAGMKDQVLALRWVNENIESFGGDKQNIITLFGSAGASAVGYHLVSPMSK<br>NLFQKAILQSGVPSMDPHIPYRTVERAFVLGNSLNIITKNSTELLSSLQELPAVELLNRTAFLFASESITHIVFKF<br>TPFTPIIEEDYQGEMIFVSEDPFDTLDSGNVSNVDIMFSYNKYEMLIMLPYVNNTRYIQRYNRYPELLVPSKIL<br>MKASDDIYYLWNKINDFYFGNKSISVENMPEFIQYAGFASLVYDVHRFIRRWVQGVNVYLFKFECISSRNFYGLP<br>GAAYGLNGPSHFDDLFFYVFPDKSLQFPLPTDSKEYKLVQQIATVFTNFACYGNPTPDSLTVGSWVPQYDKSKQAYAI<br>IADNITIDYKPDADIKFWRKVLEYAHIKF               | 5<br>6<br>2 |
|                                      | SlitCXE42  | MQWQTCVLLLCVTTAILADDEWREVKTAQGPVVRGRKHPTEDIYTFYNI PYATAPVGVDFKFKAPLPPPVWLESYEAVD<br>EQVICPQPALPFQDLEIKNELPLVKQENCLIANIYVPNTNKKNSLVVYVHGGGFVTGWGELFKATQLLKKKDIIV<br>VTFNRYRLGVHGFLCLGTEDAPGNAGMKDQVALLRWVQKNIASFGGNPDDVTIIGYSAGSASVDLLMLSESTGLFH<br>RVIPESGGNLAAFSIQRDPVEIAKTFARQLNFTNVDDIYALGEFYKTAPLELLTSDPFDRTDSTLMFSPCVERNM<br>GEETFLTESPLTILKNGKYKKLPMLYGFANMEGLFRVNFPLWKQKMNDKFSDFLPADLRFSEEEEREDVANKVKR<br>FYFGDEPVSEVNIVEYVNFDTVMFAHSMWLATKLQVEAGNNQIYLYEYSFVDKDVPEVPHTNIRGATHCAQSMAI<br>LDGKNLTHTSHTDESATPEFQMKKTMREIWNFIKTGKVPVEGSSLPAPWPAARANRSPYMSLDQKIELRGVLL<br>ERTRFWEIDIYQKHYLEPVPPPTPPPKPRSEL                 | 5<br>6<br>3 |
|                                      | SlitCXE46  | MWKILLLSVVTLGYCDDGEWKQVRTAQGEVVRGRKDPAGGLYAFNLIPYAKVPVGTDRFKAPLPAPIWLEPLDAID<br>RGIIICMQPPSPFLDTSKVMQEDCLITNVYVPDTPDDKNLPVIVYIHGGAFFIIGFGNMMTPKHLVKNKKVIVVNFNY<br>RLGVHGLCLGTEDAPGNAGLKDQVALLRWVNKNIASFGGNPDDVTIAGYSAGSVSDLLMLSKAGLFTNKVILE<br>SGVSVGFIAIQRNPIENAKTYAKMLNFTNVNDFYLMQEFYKSAPMKSMFMTFLGRKDSVTFLFSPCIERRRQNAF<br>LDESPYNI I KSGKYNKIPLMIGISNMEGSLQMHHVGIWKDSMNTKFSDFLPVDIKFQSNDRDIVSNKIKEFYFGG<br>QPVGEEITILAYLDYFGDIMFGYSTLRVAVKLHLEAGHKQIYLYEFSFVDDSPVPIPNTNERRAQHCAQTMVLEGPV<br>DGKTLSEERYNLKSVIREMWSNFAIHGTPVTEDSSLPWTTPTSAGGSPYMSGKAVEIKESFLGEHGKFWNKIYEK<br>YYSAPVAVAPPPSQAYHNEL                           | 5<br>5<br>2 |
|                                      | SlitCXE49  | MWKLVLVLLFCCLAIVLGDDSRVSTAQGPVVRGRLLPGGGVYGFYNI PYASAPTADRYKAPLPPTWVTIFEAEDR<br>KIICPHRRSGDPMNAREDCLVVNVFVPTDNTNLPVHI FVHDGAYQFGFGLQKTFTELVRQNIISVSFNRYRLGVH<br>GFLCLGTGEGAPGNAGLKDMVALLRWVNTNIASFNGNPDDVTLSLSSAGSGSLDFTLVSSLTDLGLFKKVIQESGTVI<br>GAVGAQVDP IQNARNYATVLFNDVNDFNSLEEFYKNVTIEQLISRTDAILNNEGVTARFGPCVERDLGQEIFS<br>SPMNLSSRGNYTKVPRMYGFTTMDGSVRLSIFDTWREMMNEKFSDFLPSELHFDSEEVKEQVAKVKQFYFGDSPV<br>DDHNIIVSYLNYNTDVLFAFPMLRTLSTRVGALGDP IYLFYFSFIDENSVPVLPQTDENGARHCSQERIVADGDTVAA<br>TNEYKRMQEIMRDYWMNFI SNGYPSSSDPSLPTWTPANAQRSPHMSLGRQIVLRDSSPIPERAAFWDELDFEYFRG<br>PIVMDPVPTPTTPAPGAASSLVMSNIIFVSLLLSFYFTLYLN | 5<br>7<br>5 |
|                                      | SlitCXE50  | MWKCVLVLFVCSILILVQGGQDDWLQVNITQGPVVRGRKDPNGGLYVFYNI PYATAPTGRDRFKAPLPPPVWMSPLDAV<br>NRNIRCPQPNVLEHTQEDCLVVNLVFPDTPDTNLPVLVVFVHGGAFQNGHGLSDQYRELVRTRNLIAVSFNRYRIGVH<br>GFLCLGTGEGAPGNAGIKDQVALLHWVNTNIAKFGGNPQDVTLAACSAGSGAVDVLTLSSATTGLFQKAILSEGSST<br>GAVGVIDPIQNAKNYAKVLNFNDVDDLSLEEFYRNAPFQLLTSRVDIEVDNKDTAVRFAPCVERDIGQERVITD<br>APMNVIKRGNYTKVPLLYGFTNMEGAMRLPYFDDWKVQMNEKFSDFLPAELHFDNDEEKEKVAHRVKQFYFGDS<br>SDTMEQFLLYFTDVLFAYPMLKSLARVEALGDTIYLFYFSFVDEDTPSFPHTNVRGAAHCFQSRRAVRDQDLTGR<br>TDAYRRMVQIAREYTLNFI LTGSPSTSDARFPLWRPANAQRSPHMSIGPVIELKDDILGDRAAFWDSIYEEHYRGP<br>LVDPGYTGAASSIMISKIILMAVTVGMLNW             | 5<br>6<br>3 |
|                                      | SlitCXE40  | MQISKIDGNNNKNTLMKASLLFGHANEVCEAEGIMQYRSKVASVFGEPRVDPLVLISSQGLVMGHRATDGDYSM<br>FLGVPYARVDAADPFGPSREIQPFEBIIFNANDGTVRCPQLGESSIDCLRLNIYVPFKASSNPLPVLVWIHGGNF<br>VRGSAGDYGVRLVRHDVVVTVNRYRLGPYGFMCCLDTPRVPGNQGLKDQYTALNWRINSIASFGGNPNYNTISGH<br>AGATSVLLHMYADNLKLFNKVIESGTPSEGFMVNSDENMAIKIAEHLGVNTTDGNEALEFLINSPHNLVAGAAH<br>ELNLPLGPCKEKSFSGIEFNVENDPYALTNAKVRNTPVILIGYTSRERDSLSADYFSDSPFYEKLKNNFNLNQQL<br>ENAAATFVRRFYIGDNPVTSVSTQLQNFESDFVINHPSERIITRLDENVGSVYEYLFYSYTGSTNDGAGHSELNY<br>LFNDGSGNIVRSEDDQLIADRISTLWTNFVKYGDPTPQTSDLLPVKWPTVTISSRPTMVIDTDIRMDSRVENQRMA<br>FWDLFYSVYGSYSNLARECSFTDCC                             | 5<br>5<br>7 |
|                                      | SlitCXE41  | MTSLGRISVALLVLFHHTQCLPRVDPLVDTKVGLIRGLRADDGNYSKFLGIPYAQVNPDPNPFGEESTPQPKFEETFE<br>AYDESAVCPQWYWWTGEIDGNPDCLQLNVYVPDTANSNNRPLPVMVWIYGGAFERGEFSQKLYGPTYLVKHDMVMA<br>INRYRVGPYGFMCCLDTPETIAGNQGLKDQHLGLQWVKDNI EAFGGDANQITLFGLSAGGHSIDLHLLSQRREVIY<br>NQKVIQSGSSLAATVLYEPDKLAHIKLAQLHGFETDTTNEAISFLAKSDSNLVIAATLDLGIIFKPCVENSFEVGEPLN<br>SSWIHAGTPKVRNMPVLTGYNEHGLASFHNKDEEYFKNLNIISDYMKRI FNFGEELQEMSDSIAHFYIGDEAIS<br>SDVKLALIMDSDFTYIHPIQRSIQYLEARNRVYVFSYLGGRNAILDNGGVEDNSSNVCCAAHADELPLYL<br>MVNKPPTTEHDEIVIERMTTMTWNTFAKYGDPTPQTSDLLPVKWEPLTKESFTYMDIGSELSLGRPPAHD<br>RMAYWDLFYKLNQDKHK                                    | 5<br>4<br>3 |
|                                      | SlitCXE69  | MWIVGLLVLLCGLVQGLYRVDPLVSTNKGLIRGLRSNEGQAQFLGVPAVVDKNNPFGPSVPHPGFDDIYEAYESN<br>VCPQVSSDEAIGTIDCLTMNIYVPSAATTQNRPLPVMVWIHGGAFVTGSAQTEGNPNFLLRNDVIVVAINRYRLGAYG<br>FMCLDIPVPGNQGLKDQVLALRWINENIEAFGGDVSTQITVFGESAGGMSVNLHLLSSYERLFQKAI IQSGPASSP<br>WLIVESDKTIPIKLANFLDFETEDTLEALEYLASVDVHTLIKVAHDLKITDSTGTKNPGTLPCIEKEIDGESFIT<br>NHPMNINTPKVRNTPVII GHTNNELPFQYGLADSDFFANYDFSLLSNAFDLEDDWEDAVNDVRHFIYIGDEAANKNV<br>ADKITDFASDFVFNHPTQRMADRILDIGGRTVYRYVFSYSGNRNLLKVLFNLNATGAIHADDELGYLFDNVELFGEQ<br>VTPQDQLMIDRLTTLWTNFAKYGDPTPATSDLLPVKWQPI TKTSQPYLNLSDSLTLGARPPHDMAFWDLFYKLYG<br>NQQYKGLSGK                                | 5<br>4<br>2 |
|                                      | SlitCXE100 | MWSVILLISFCGLVQGLSRVDPLVSTKSGLIRGLLTDSGYAQFLGVPAEVNKSNNPFGPANPHPGFNDIYEAYKSN<br>VCPQVSYNVTVGTIDCLTLNIYVPSAATSKNRLPVMVWIHGGYFIVGSGDAVRIPDYLLRNDVIVVTINRYRLGAYG<br>FMCLDIPVSGNQGLKDQVLALRWINDNIDAFGGDVSTQITVFGESAGGMSVNLHLLSSYEPFLQKAI IQSGPAVSP<br>WVMKGTDNVPIKLAELNFPDSDVSEAI AFLSTIEVHTLIRLAHDLKLTFFMSLEDSPTVPCVEKKMEGVEHFL<br>TEYMTIES TKLKNVPVILGVTSNLEFMGYTADDEFFRNFDFTVLNTAIDLGEKFDVAEDIRHFIYIGDEDTSEK<br>VKDEITNFASDVLFNHPTERMAKRLLELGAKSVMYVFSYSGGRNVIKIRLNLNGTGAVHADELGYLFDSELTGD<br>IAPEDQLMIDRITTTMTWNTFAKYGDPTPSTSGLLPIKWEPI TRTTHPYLNLSDLSLESRPFHSRMAFWDLFYKVYV<br>N                                              | 5<br>3<br>3 |
| C<br> <br>a<br>d<br>e<br>0<br>0<br>1 | SlitAchE1  | MRVLAALATALAARALAGPHEHRRARHHAPEHPPHPAPAPPQPYRGHGEAVRYNPELDITLPRLEDHETSSKRAK<br>EDAETSSKRAKYDERFYSNHERADEEPMADEPQLGPEDDDDPLVVRTRKGRVRGITLTAATGKKVDANWFGIPYAQK<br>VGDRLFRHPRPAESWGDEIILNTTTLPHSCVQI IDTVFGDFPGAMWNPNTDMQEDCLFINI VTPRPRPKNAAVMLW<br>VFGGGFYSGTATLDVYDAKILVSEEKVVVYSMQYRVASLGFLFFDTPDPVGNAGLFDQLMALQWVKDNIAYFGGNP                                                                                                                                                                                                                                                                                                | 6<br>9<br>5 |

|                            |           |                                                                                                                                                                                                                                                                                                                                                                                                                                                                                                                                                                                                                                                                                             |             |
|----------------------------|-----------|---------------------------------------------------------------------------------------------------------------------------------------------------------------------------------------------------------------------------------------------------------------------------------------------------------------------------------------------------------------------------------------------------------------------------------------------------------------------------------------------------------------------------------------------------------------------------------------------------------------------------------------------------------------------------------------------|-------------|
| a<br>d<br>e<br>0<br>2<br>7 |           | HNITLFGESAGAVSVSLHLLSPLSRNLFSSQAIMQSGAATAPWAIISREESILRGIRLAEAVHCPHSRTDMGPMIEC<br>LRKKSPDELVNNEWGTLGICEFPFVPIIDGSFLDELPARSLAHQNFKKTNLLMGSNTEEGYFIFYLTELFPKEE<br>NVGISREQYLQAVRELNPHYVNDVGRQAI VFEYTDWLNPDPIRNRNALDKMVG DYHFTCGV NEMAHRYAETGNNVF<br>TYYYKHRSKNNPWPSWTGVMHADEINYVFG EPLNPGKNYSPEEVEFSKRLMRYWANFARTGNPSINPNGESTKIYW<br>PVHSATGREYLSLAVNSSTVGHGLRVKECAFWQKYL PQLMSATNKPEPPKNCTSSAAPIKVPYEIIIGVGVIATGL<br>AKTTMFKYIV                                                                                                                                                                                                                                                              |             |
|                            | SlitAchE2 | MISNTKIVFTKLLCCIVSGAWTRSWANHHD TTTSTQTTPPTSQAPKNFHN DPLIVETKSGLVKGYAKTVMGREV<br>HIFTGIPFAKPPLGPLRFRKPVPIDPWHGVLEATAMPNSCYQERYEYFPGFEGEEMWNPNTNISEDCLYLN I WVPQ<br>HLRVRHHQDKPLTERPKVPILVWIYGGGYMSGTATLDLYKADIMASSSDVIVASMQYRVGAFGFLYLNKYFSPGSE<br>EAPGNMGLWDQQLAIRWIKDNARAFGGDPELITLFGESAGGGSVSLHMLSPEMKGLFKRGILQSGTLNAPWSWMTG<br>ERAQDIGKVLVDDCNCNSSLAADPSLVMDCMRGVDAKTISVQQWNSYTGILGFPSAPTVDGVFLPKDPDTMMKEG<br>HFNHTEVLLGSNQDEGTYFLLYDFLDYFEKDGPSFLQREKFLEIVDTIFKDFSKIKREAIVFQYTDWEEITDGYLN<br>QKMIADVVDYFFVCPTNYFAEVLADSGVEVYYYYFTHRTSTSLWGEWMGMHGDEMEYVFGHPLNMSLQYHTRER<br>DLAAHMQSFTRFALTGKPHKPDEKWPLYSRSSPHYTYTADGTSGPAGPRGPRASACAFWNDFLNKLNELEHMPC<br>DGAVTGPYSSVAGTTLPIVLLTTLATTVAL | 6<br>3<br>8 |

**Table S2:** Spodopteran GSTes reconciled nomenclature, with new annotations combined with previous studies.

| <b><i>Spodoptera litura</i></b>                 |                    |                             |                            |            |
|-------------------------------------------------|--------------------|-----------------------------|----------------------------|------------|
| This study                                      | Zhang et al., 2016 | Cheng et al., 2017          | Genbank<br>GCF_002706865.1 | chromosome |
| <i>SlGSTe1</i>                                  | AAS79891           | SWUSI0010470<br>_SlituGST14 | LOC111364724               | Chr1       |
| <i>SlGSTe2</i>                                  | ACZ73898           | SWUSI0064760<br>_SlituGST05 | LOC111351682               | Chr14      |
| <i>SlGSTe3</i>                                  | ACZ738999          | SWUSI0064770<br>_SlituGST08 | LOC111351684               | Chr14      |
| <i>SlGSTe4</i>                                  | KF482955           | SWUSI0064780<br>_SlituGST07 | LOC111351681               | Chr14      |
| <i>SlGSTe5</i>                                  | KF482956           | SWUSI0091750<br>_SlituGST24 | LOC111355027               | Chr20      |
| <i>SlGSTe6</i>                                  | KF482957           | SWUSI0010470<br>_SlituGST15 | LOC111347873               | Chr1       |
| <i>SlGSTe7</i>                                  | KF482958           | SWUSI0108040<br>_SlituGST10 | LOC111357178               | Chr24      |
| <i>SlGSTe8</i>                                  | KF482959           | SWUSI0040720<br>_SlituGST23 | LOC111349356               | Chr9       |
| <i>SlGSTe9</i>                                  | KF482960           | SWUSI0040700<br>_SlituGST17 | LOC111349355               | Chr9       |
| <i>SlGSTe10</i>                                 | KF482961           | SWUSI0040720<br>_SlituGST22 | LOC111349356               | Chr9       |
| <i>SlGSTe11</i>                                 | KF482962           | SWUSI0005590<br>_SlituGST38 | LOC111364883               | Chr1       |
| <i>SlGSTe12</i>                                 | KF482963           | SWUSI0038410<br>_SlituGST12 | LOC111348828               | Chr8       |
| <i>SlGSTe13</i>                                 | KF482964           | SWUSI0038420<br>_SlituGST13 | LOC111348827               | Chr8       |
| <i>SlGSTe14</i>                                 | KF482965           | SWUSI0040710<br>_SlituGST18 | LOC111349355               | Chr9       |
| <i>SlGSTe15</i>                                 | KF482966           | SWUSI0038400<br>_SlituGST11 | LOC111348844               | Chr8       |
| <i>SlGSTe16</i>                                 |                    | SWUSI0040730<br>_SlituGST16 | LOC111349158               | Chr9       |
| <i>SlGSTe17</i>                                 |                    | SWUSI0064750<br>_SlituGST06 | LOC111351683               | Chr14      |
| <i>SlGSTe18</i>                                 |                    | SWUSI0005600<br>_SlituGST25 | LOC111364904               | Chr1       |
| <i>SlGSTe19</i>                                 |                    | SWUSI0040750<br>_SlituGST21 | LOC111349160               | Chr9       |
| <i>SlGSTe20</i>                                 |                    | SWUSI0040740<br>_SlituGST20 | LOC111349159               | Chr9       |
| <b><i>Spodoptera frugiperda corn strain</i></b> |                    |                             |                            |            |

| This study                                      | V6 genome assembly (Gimenez et al., 2020)      | chromosome   |
|-------------------------------------------------|------------------------------------------------|--------------|
| SfCGSTe1                                        | SFRUCORN610000010054                           | Scaffold_107 |
| SfCGSTe2                                        | SFRUCORN610000007603                           | Scaffold_116 |
| SfCGSTe3                                        | SFRUCORN610000007603                           | Scaffold_116 |
| SfCGSTe4                                        | SFRUCORN610000007603                           | Scaffold_116 |
| SfCGSTe5                                        | SFRUCORN610000003468                           | Scaffold_118 |
| SfCGSTe6                                        | SFRUCORN610000010054                           | Scaffold_107 |
| SfCGSTe7                                        | SFRUCORN610000012733                           | Scaffold_114 |
| SfCGSTe8                                        | SFRUCORN610000013771                           | Scaffold_47  |
| SfCGSTe9                                        | SFRUCORN610000013772                           | Scaffold_47  |
| SfCGSTe10                                       | SFRUCORN610000013771                           | Scaffold_47  |
| SfCGSTe11                                       | SFRUCORN610000018645                           | Scaffold_107 |
| SfCGSTe12                                       | SFRUCORN610000029704                           | Scaffold_93  |
| SfCGSTe14                                       | SFRUCORN610000013772                           | Scaffold_47  |
| SfCGSTe15                                       | SFRUCORN610000029703                           | Scaffold_93  |
| SfCGSTe16                                       | SFRUCORN610000013771                           | Scaffold_47  |
| SfCGSTe17                                       | SFRUCORN610000007603                           | Scaffold_116 |
| SfCGSTe18                                       | SFRUCORN610000018646                           | Scaffold_107 |
| SfCGSTe20                                       | SFRUCORN610000013771                           | Scaffold_47  |
| SfCGSTe21                                       | SFRUCORN610000013771                           | Scaffold_47  |
| <b><i>Spodoptera frugiperda</i> rice strain</b> |                                                |              |
| This study                                      | latest V3 genome assembly (Gouin et al., 2017) | chromosome   |
| SfRGSTe1                                        | SFRURICE00000011418                            | Contig162    |
| SfRGSTe2                                        | SFRURICE00000005971                            | Contig39     |
| SfRGSTe3                                        | SFRURICE00000005971                            | Contig39     |
| SfRGSTe4                                        | SFRURICE00000005971                            | Contig39     |
| SfRGSTe5                                        | SFRURICE00000026315                            | Contig2      |
| SfRGSTe6                                        | SFRURICE00000011418                            | Contig162    |
| SfRGSTe8                                        | SFRURICE00000030251                            | Contig524    |
| SfRGSTe9-1                                      | SFRURICE00000030253                            | Contig524    |
| SfRGSTe9-2                                      | SFRURICE00000026789                            | Contig830    |
| SfRGSTe10-1                                     | SFRURICE00000030251                            | Contig524    |
| SfRGSTe10-2                                     | SFRURICE00000030251                            | Contig524    |
| SfRGSTe11                                       | SFRURICE00000014441                            | Contig697    |
| SfRGSTe12                                       | SFRURICE00000003921                            | Contig401    |
| SfRGSTe13                                       | SFRURICE00000003921                            | Contig401    |
| SfRGSTe14                                       | SFRURICE00000026789                            | Contig830    |
| SfRGSTe15                                       | SFRURICE00000003920                            | Contig401    |
| SfRGSTe16                                       | SFRURICE00000030251                            | Contig524    |
| SfRGSTe17                                       | SFRURICE00000005973                            | Contig39     |
| SfRGSTe18                                       | SFRURICE00000014439                            | Contig697    |
| SfRGSTe20                                       | SFRURICE00000030251                            | Contig524    |
| SfRGSTe21                                       | SFRURICE00000030251                            | Contig524    |

## Sequence retrieval

*Spodoptera* coding sequences for detoxification genes were retrieved from the latest genomic datasets: for *Spodoptera litura* datasets (Cheng et al., 2017) were combined to the chromosome-level assembly from NCBI (Genbank: GCF\_002706865.1); sequences for *Spodoptera frugiperda* Corn strain were from the latest V6 genome assembly (Gimenez et al., 2020) and from Gouin et al., 2017 for the Rice strain (V3); sequences for *Spodoptera exigua* were from the chromosome-level genome sequences from NCBI (GenBank: GCA\_011316535.1). Given the absence of genome assembly for *Spodoptera littoralis* candidate detoxification cDNAs were identified from a de novo transcriptome (Poivet et al., 2013). Reciprocal tBLASTn and exonerate (Slater et al., 2005) searches were performed against the different datasets to generate complete repertoires for all detoxification gene families.

## Multiple sequence alignments and phylogenetic analysis

Amino acid sequences were aligned using MAFFT (using L-INS-i option) (Katoh and Standley, 2013) implemented in the Geneious software (<http://www.geneious.com>, Kearse et al., 2012). Phylogenetic trees were constructed using PhyML (Guindon et al., 2010) based on the best substitution model as determined by the SMS server (Lefort et al., 2017), using Nearest Neighbor Interchange (NNI). Branch supports were estimated by a Bayesian-like transformation of aLRT (aBayes) (Anisimova et al., 2011). A dendrogram was then created, annotated and colored using FigTree software (<http://tree.bio.ed.ac.uk/software/figtree/>).

## Refs

- Slater, G. S., & Birney, E. (2005). Automated generation of heuristics for biological sequence comparison. *BMC Bioinformatics*, 6, 31. doi:10.1186/1471-2105-6-31
- Gimenez, S., Abdelgaffar, H., Goff, G. L., Hilliou, F., Blanco, C. A., Hanniger, S., . . . Nam, K. (2020). Adaptation by copy number variation increases insecticide resistance in the fall armyworm. *Commun Biol*, 3(1), 664. doi:10.1038/s42003-020-01382-6
- Cheng, T., Wu, J., Wu, Y., Chilukuri, R. V., Huang, L., Yamamoto, K., . . . Mita, K. (2017). Genomic adaptation to polyphagy and insecticides in a major East Asian noctuid pest. *Nat Ecol Evol*, 1(11), 1747-1756. doi:10.1038/s41559-017-0314-4
- Gouin, A., Bretaudeau, A., Nam, K., Gimenez, S., Aury, J. M., Duvic, B., . . . Fournier, P. (2017). Two genomes of highly polyphagous lepidopteran pests (*Spodoptera frugiperda*, Noctuidae) with different host-plant ranges. *Sci Rep*, 7(1), 11816. doi:10.1038/s41598-017-10461-4
- Poivet, E., Gallot, A., Montagne, N., Glaser, N., Legeai, F., & Jacquin-Joly, E. (2013). A comparison of the olfactory gene repertoires of adults and larvae in the noctuid moth *Spodoptera littoralis*. *PLoS ONE*, 8(4), e60263. doi:10.1371/journal.pone.0060263
- Katoh, K., & Standley, D. M. (2013). MAFFT multiple sequence alignment software version 7: improvements in performance and usability. *Mol Biol Evol*, 30(4), 772-780. doi:10.1093/molbev/mst010
- Kearse, M., Moir, R., Wilson, A., Stones-Havas, S., Cheung, M., Sturrock, S., . . . Drummond, A. (2012). Geneious Basic: an integrated and extendable desktop software platform for the organization and analysis of sequence data. *Bioinformatics*, 28(12), 1647-1649. doi:10.1093/bioinformatics/bts199
- Guindon, S., Dufayard, J. F., Lefort, V., Anisimova, M., Hordijk, W., & Gascuel, O. (2010). New algorithms and methods to estimate maximum-likelihood phylogenies: assessing the performance of PhyML 3.0. *Syst Biol*, 59(3), 307-321. doi:10.1093/sysbio/syq010
- Lefort, V., Longueville, J. E., & Gascuel, O. (2017). SMS: Smart Model Selection in PhyML. *Mol Biol Evol*, 34(9), 2422-2424. doi:10.1093/molbev/msx149
- Anisimova, M., Gil, M., Dufayard, J. F., Dessimoz, C., & Gascuel, O. (2011). Survey of branch support methods demonstrates accuracy, power, and robustness of fast likelihood-based approximation schemes. *Syst Biol*, 60(5), 685-699. doi:10.1093/sysbio/syr041
